# Supplementary material for: Methane Flux Effect on Hydrate Formation and Its Acoustic Responses in Natural Sands
Source: Hindawi journal article supplement (doi:10.1155/2022/7746386), 2022-05-30
Supplement: f1 [file 7746386.f1.docx]

**Supplementary Materials Introduction**

The supporting information contains text S1 and S2, figure S1-S5, table S1, S2 and S3. Text S1 and S2 introduce the measuring method of the acoustic data and hydrate saturation, separately. Figure S1-S3 exhibit theCalibration of the ultrasonic transducers. Figure S4 exhibits theCalibration of the TDR probes. Figure S5 exhibits the inner of the apparatus, especially for the microporous sintered plate. Table S1, S2 and S3 are the detail data of the calibration.

And also the supporting information contains table S4, S5, S6, S7, S8, S9 and S10. They are the detailed data of Figure 2,3,4-9,11.

**Text S1.**

P wave and S wave velocity were measured by using two transducers placed at each side of the apparatus. Signals were digitized by a CompuScope card from Gage Corporation in Canada. Because the CompuScope 14100 is 14 bit 50 MS/s dual channel waveform digitizer card and data transfer rates from the CompuScope memory to PC memory run as high as 80 MB/s, it’s thought there are few errors in velocity estimation caused by the CompuScope card. However, the error of velocity estimation is mainly from picking t1 and t2, which are the traveltimes of the compressional and shear wave, respectively. The velocities are calculated by *Vp*=L/(t1-t0) and *Vs*=L/(t2-t0), where L is the sample length and t0 is the inherent traveltime of the transducers. Four different lengths of standardized polyformaldehyde(POM) rods were used to calibrate the t0 of the transducers.

Compressional and shear wave velocities are determined by the followings:

（1）

（2）

Where, L is the sample length, top and tos are the inherent traveltime of the transducers, tp and ts are the traveltime of P- and S- wave, respectively. Four different lengths of standardized polyoxymethylene (POM) rods were used to calibrate the t0 of the transducers.

（3）

（4）

According to the formula we can get the P- and S- wave velocities in the POM rods and the inherent traveltime of the transducers, Vp=2300m/s, top=3.04µs; Vs=943m/s, tos=10.17µs.

**Text S2.**

A TDR100 unit and a coaxial-type probe were used in the experiment. Wright et al. (2002) measured the water content of methane hydrate-bearing sediment with TDR. Their result indicated that the accuracy of water content measurement is ±2~2.5%. Thus, we only consider the effects of temperature (20~0.5°C) and pressure (1~7 MPa) on the water content measurements in our experiments. The results show that both temperature and pressure have small influences on water content measurements. With the TDR traces obtained in the experiments, we calculated the water content (θV) of the sample using Wright’s empirical equation (Wright et al., 2002). Subsequently, the saturation of hydrates in pore spaces of sediments was obtained with Sh=(φ-θV)/ φ×100%, where φ is the porosity of the sample.

Add 10% water saturation to the sediments and measure the TDR waveform, and then add 10% water in turn. The TDR waveforms with different water content are shown in Figure 4. Relative errors of volumetric water content in 10%~90% water saturation sand are calculated (Table S3).

Time domain reflectometry (TDR) is based on the principle of electromagnetic wave propagation, the characteristics of the medium is determined according to its propagation in the medium. TDR technology was used to detect defects in communication cables in the early years, and then Topp et al. (1980) and Davis and Chudobiak (1975) use the technology to measure the water content soil. Wright et al. (2002) applied the TDR technology in the determination of hydrate saturation and obtained good results.

The electromagnetic wave is transmitted by the TDR instrument and transmitted to the TDR probe through the cable. The electromagnetic wave propagate in the medium, and the electromagnetic wave is received after reflected. The reflected waveform is used to analyze the dielectric constant and other parameters.

**
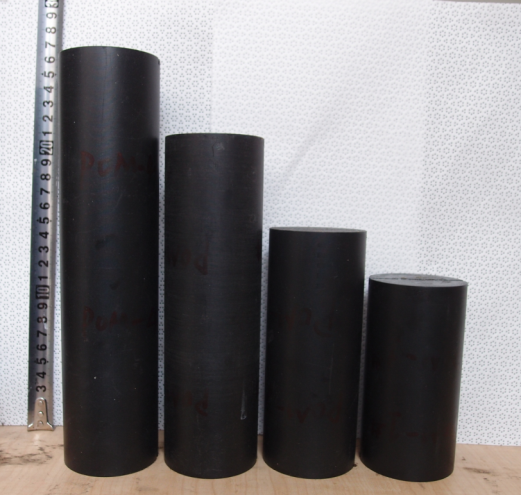

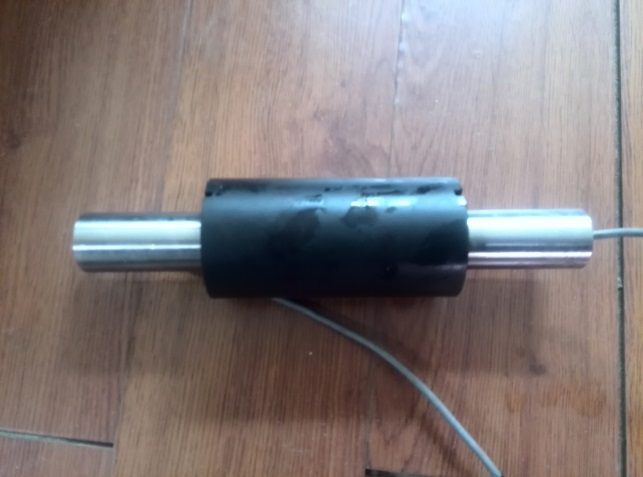
**

**Figure S1.** Four POM rods and ultrasonic probes (left) method for assembling POM rod (right)


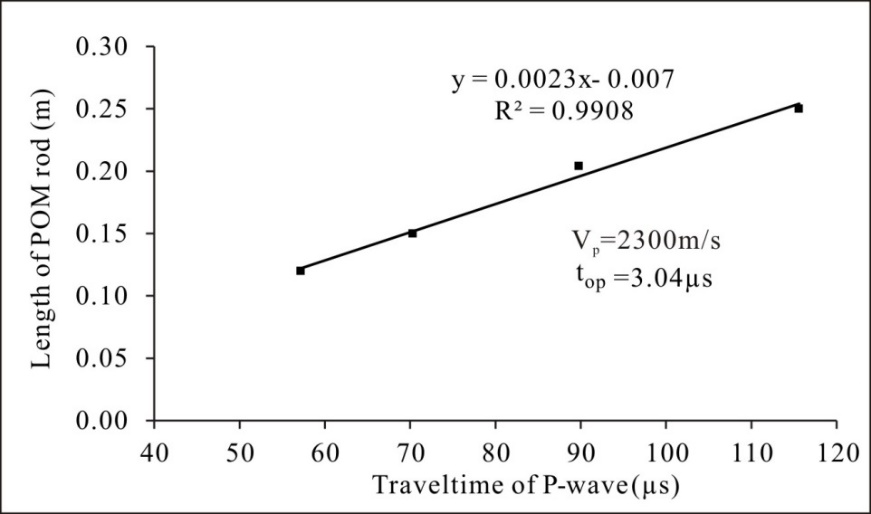


**Figure S2.** Matched line using POM P-wave data


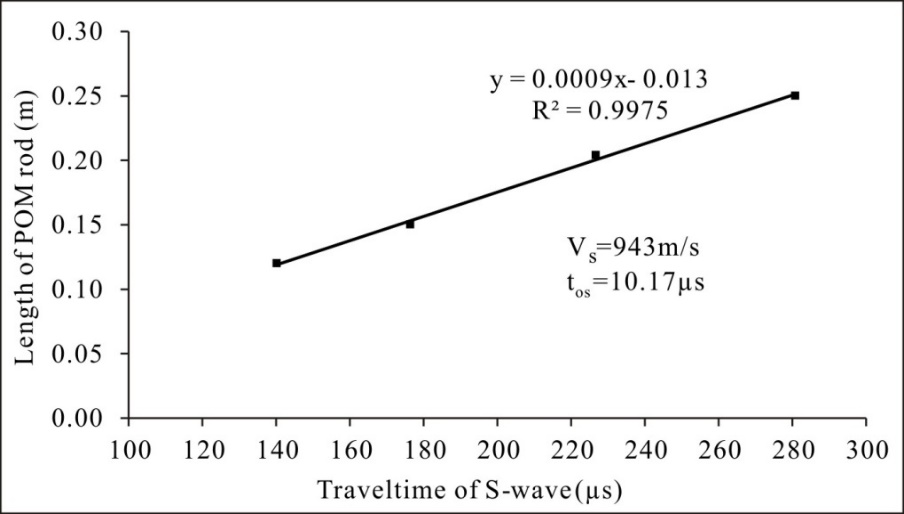


**Figure S3.** Matched line using POM S-wave data


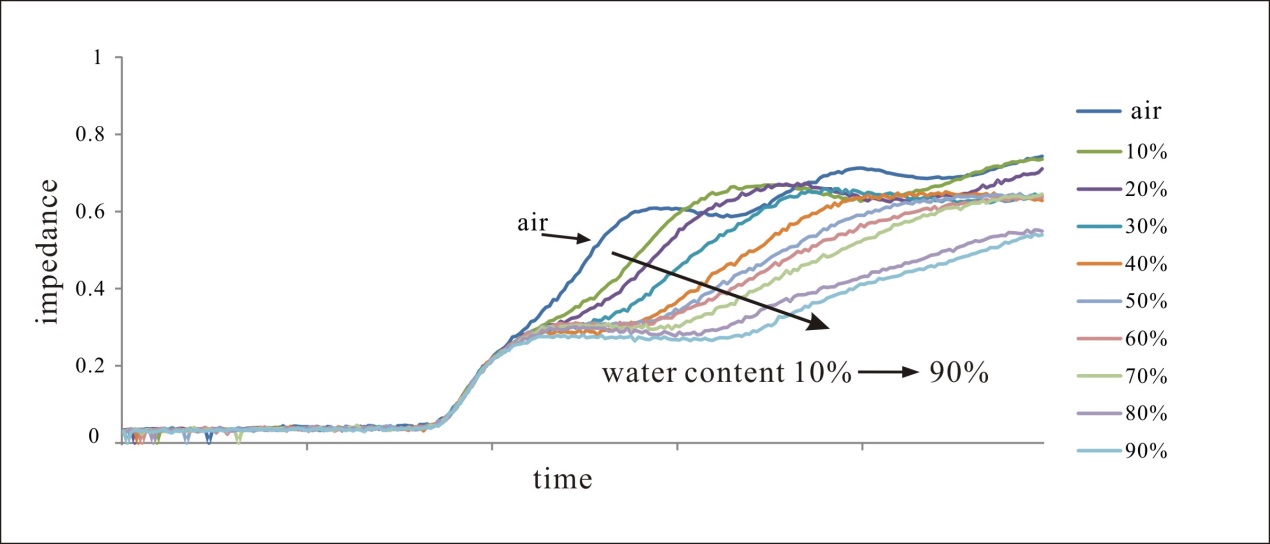


**Figure S4.** Changes of TDR waveform in the process of increasing water saturation in the sand; the sand use in the calibrate is 0.15-0.30 mm


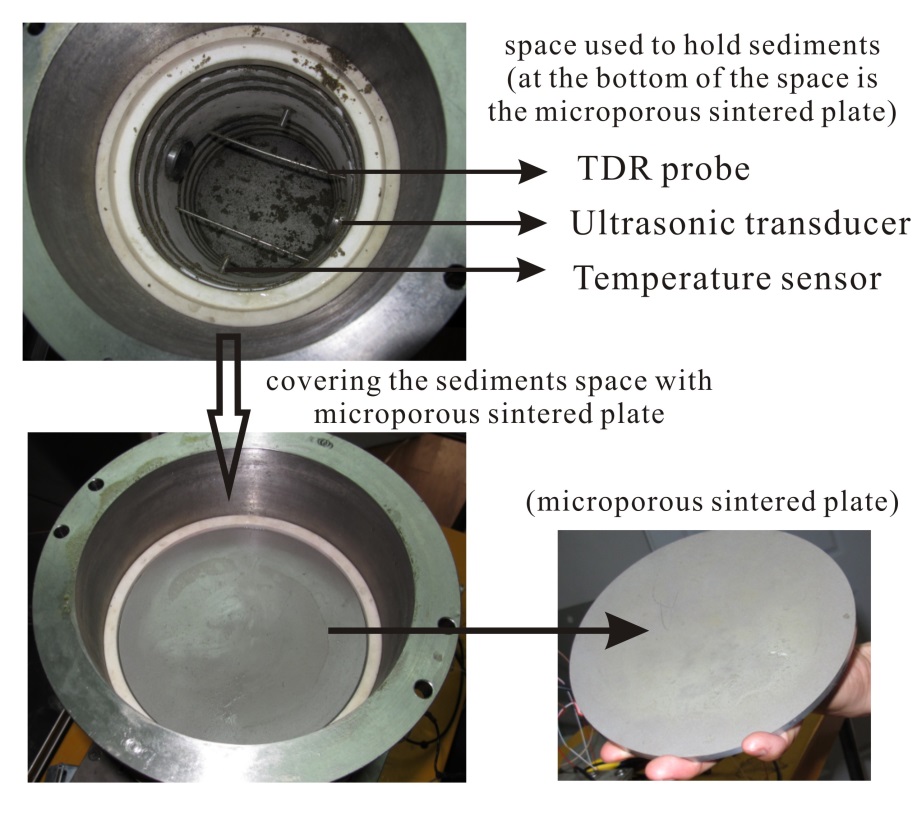


**Figure S5.** The inner of the apparatus and the position of the microporous sintered plate

**Table S1.** POM standard for calibrating inherent time

| No. | Diameter/mm | Length/mm |
| --- | --- | --- |
| POM-1 | 60.4 | 120 |
| POM-2 | 60.4 | 150 |
| POM-3 | 60.4 | 204 |
| POM-4 | 60.4 | 250 |

**Table S2.** Testing time for P- and S- wave of POM rods

| No. | POM-1 | POM-2 | POM-3 | POM-4 |
| --- | --- | --- | --- | --- |
| Length (m) | 0.12 | 0.15 | 0.204 | 0.25 |
| Average time of tp (µs) | 53.972 | 66.784 | 90.988 | 110.784 |
| Average time of ts (µs) | 140.254 | 163.411 | 233.220 | 271.544 |

**Table S3.** Relative error of volumetric water content in 10%~90% water saturation sand using TDR method

| Water saturation /% | Water content | The sand porosity /% | Measured water saturation /% | Relative error /% |
| --- | --- | --- | --- | --- |
| 10 | 3.9 | 39.8 | 9.8 | 2.0 |
| 20 | 8.3 | 39.8 | 20.8 | 4.0 |
| 30 | 12.7 | 39.8 | 31.9 | 6.3 |
| 40 | 16.3 | 39.8 | 40.9 | 2.2 |
| 50 | 19.8 | 39.8 | 49.7 | 0.6 |
| 60 | 23.2 | 39.8 | 58.3 | 2.8 |
| 70 | 27.2 | 39.8 | 68.3 | 2.4 |
| 80 | 31.7 | 39.8 | 79.6 | 0.5 |
| 90 | 36.5 | 39.8 | 91.93 | 2.1 |

**The reference information for Table 3:**

The contents of mineral composition were measured in Qingdao Institute of Marine Geology. The physical parameters of minerals were referenced from the following references.

Helgerud M B, Dvorkin J and Nur A. Elastic-wave velocity in marine sediments with gas hydrates: Effective medium modeling. Geophysical Research Letters, 1999, 26(13):2121-2124.

Ahrens T J, Mineral Physics & Crystallography: A Handbook of Physical Constants [M]. Published by American Geophysical union, April, 1995: 7-54.

Dvorkin J, Prasad M, Sakai A, et al. Elasticity of Marine sediments: Rock physics modeling. Geophysical Research Letters, 1999, 26(12): 1781-1784.

**Table S4. Data for Figure 2**

| Gas flux mode/( ml/min) | Time/(h) | T/℃ | Upper gas cell pressure /Mpa | Lower gas cell pressure /Mpa | Hydrate saturation/% |
| --- | --- | --- | --- | --- | --- |
| 30 | 0 | 16.81 | 6.14 | 6.15 | 0 |
| 30 | 1 | 11.92 | 6.00 | 6.00 | 0 |
| 30 | 2 | 8.08 | 5.76 | 5.77 | 7.3 |
| 30 | 2.25 | 7.55 | 5.66 | 5.68 | 13.8 |
| 30 | 2.5 | 7.23 | 5.65 | 5.66 | 20.6 |
| 30 | 2.75 | 6.93 | 5.55 | 5.57 | 30.2 |
| 30 | 3 | 6.83 | 5.53 | 5.56 | 37.9 |
| 30 | 3.25 | 6.60 | 5.45 | 5.45 | 45.9 |
| 30 | 3.5 | 6.49 | 5.42 | 5.42 | 51.4 |
| 30 | 3.75 | 6.34 | 5.33 | 5.33 | 54.2 |
| 30 | 4 | 6.25 | 5.30 | 5.30 | 59.9 |
| 30 | 5 | 5.62 | 5.00 | 5.03 | 62.8 |
| 30 | 6 | 5.17 | 4.68 | 4.69 | 62.8 |
| 30 | 7 | 5.03 | 4.34 | 4.37 | 65.6 |
| Gas flux mode/( ml/min) | Time/(h) | T/℃ | Upper gas cell pressure /Mpa | Lower gas cell pressure /Mpa | Hydrate saturation/% |
| 30 | 8 | 4.45 | 4.04 | 4.06 | 68.5 |
| 30 | 9 | 3.96 | 3.77 | 3.79 | 68.5 |
| 30 | 10 | 3.56 | 3.56 | 3.59 | 71.4 |
| 30 | 11 | 3.31 | 3.44 | 3.47 | 71.4 |
| 30 | 12 | 3.12 | 3.34 | 3.38 | 71.4 |
| 30 | 14 | 2.70 | 3.28 | 3.31 | 71.4 |
| 30 | 16 | 2.69 | 3.29 | 3.33 | 71.4 |
| 30 | 18 | 2.68 | 3.34 | 3.37 | 71.4 |
| 30 | 20 | 2.55 | 3.41 | 3.44 | 71.4 |
| 30 | 22 | 2.45 | 3.45 | 3.50 | 71.4 |
| 30 | 24 | 2.26 | 3.46 | 3.50 | 71.4 |
| 30 | 30 | 1.58 | 3.54 | 3.58 | 71.4 |
| 30 | 36 | 1.43 | 3.62 | 3.66 | 71.4 |
| 30 | 40 | 1.43 | 3.82 | 3.86 | 71.4 |
| 30 | 46 | 1.43 | 4.00 | 4.04 | 71.4 |
| 60 | 0 | 23.79 | 6.04 | 6.07 | 0 |
| 60 | 1 | 22.11 | 6.01 | 6.02 | 0 |
| 60 | 2 | 16.08 | 5.74 | 5.77 | 0 |
| 60 | 3 | 11.80 | 5.49 | 5.52 | 0 |
| 60 | 3.5 | 10.22 | 5.35 | 5.37 | 13.8 |
| 60 | 4 | 9.00 | 5.24 | 5.27 | 23.0 |
| 60 | 5 | 7.77 | 5.08 | 5.10 | 37.9 |
| 60 | 6 | 7.37 | 4.89 | 4.89 | 48.7 |
| 60 | 7 | 6.89 | 4.63 | 4.65 | 51.5 |
| 60 | 8 | 6.17 | 4.42 | 4.44 | 68.5 |
| 60 | 9 | 5.74 | 4.25 | 4.27 | 68.5 |
| 60 | 10 | 5.47 | 4.19 | 4.21 | 74.2 |
| Gas flux mode/( ml/min) | Time/(h) | T/℃ | Upper gas cell pressure /Mpa | Lower gas cell pressure /Mpa | Hydrate saturation/% |
| 60 | 11 | 5.14 | 4.19 | 4.20 | 74.2 |
| 60 | 12 | 4.92 | 4.19 | 4.20 | 74.2 |
| 60 | 14 | 4.61 | 4.23 | 4.23 | 74.2 |
| 60 | 16 | 4.40 | 4.28 | 4.29 | 74.2 |
| 60 | 22 | 4.08 | 4.53 | 4.54 | 74.2 |
| 60 | 28 | 3.90 | 4.82 | 4.84 | 74.2 |
| 60 | 34 | 3.45 | 5.07 | 5.10 | 74.2 |
| 60 | 40 | 3.69 | 5.44 | 5.44 | 74.2 |
| 60 | 46 | 3.58 | 5.53 | 5.54 | 74.2 |
| 200 | 0 | 24.35 | 6.05 | 6.09 | 0 |
| 200 | 1 | 23.82 | 6.08 | 6.07 | 0 |
| 200 | 2 | 19.12 | 6.06 | 6.05 | 0 |
| 200 | 3 | 13.04 | 5.94 | 5.94 | 0 |
| 200 | 4 | 8.64 | 5.77 | 5.76 | 0 |
| 200 | 5 | 6.53 | 5.79 | 5.57 | 11.6 |
| 200 | 5.25 | 6.36 | 5.80 | 5.52 | 23.0 |
| 200 | 5.5 | 6.28 | 5.80 | 5.44 | 27.8 |
| 200 | 5.75 | 6.34 | 5.80 | 5.41 | 37.9 |
| 200 | 6 | 6.41 | 5.79 | 5.33 | 40.6 |
| 200 | 6.5 | 6.47 | 5.80 | 5.19 | 48.7 |
| 200 | 7 | 6.37 | 5.80 | 5.05 | 65.7 |
| 200 | 8 | 5.73 | 5.80 | 4.82 | 65.7 |
| 200 | 9 | 5.24 | 5.80 | 4.66 | 65.7 |
| 200 | 10 | 4.94 | 5.80 | 4.63 | 79.9 |
| 200 | 11 | 4.48 | 5.80 | 4.70 | 79.9 |
| 200 | 12 | 3.88 | 5.80 | 4.83 | 79.9 |
| 200 | 14 | 2.83 | 5.80 | 5.17 | 79.9 |
| Gas flux mode/( ml/min) | Time/(h) | T/℃ | Upper gas cell pressure /Mpa | Lower gas cell pressure /Mpa | Hydrate saturation/% |
| 200 | 16 | 2.29 | 5.80 | 5.56 | 82.7 |
| 200 | 22 | 1.61 | 5.71 | 6.57 | 82.7 |
| 200 | 28 | 1.72 | 5.80 | 6.58 | 82.7 |
| 200 | 34 | 1.37 | 5.77 | 6.59 | 82.7 |
| 200 | 40 | 1.59 | 5.76 | 6.59 | 82.7 |
| 400 | 0 | 27.17 | 6.07 | 6.11 | 0 |
| 400 | 1 | 23.06 | 6.12 | 6.12 | 0 |
| 400 | 2 | 15.80 | 6.10 | 6.11 | 0 |
| 400 | 3 | 10.01 | 6.11 | 6.12 | 0 |
| 400 | 3.5 | 8.69 | 6.13 | 6.14 | 18.3 |
| 400 | 4 | 7.92 | 6.13 | 6.13 | 27.8 |
| 400 | 4.5 | 7.50 | 6.15 | 6.14 | 40.6 |
| 400 | 5 | 7.19 | 6.15 | 6.14 | 48.7 |
| 400 | 5.5 | 6.94 | 6.14 | 6.14 | 54.3 |
| 400 | 6 | 6.74 | 6.14 | 6.13 | 68.5 |
| 400 | 7 | 6.66 | 6.10 | 6.11 | 71.4 |
| 400 | 8 | 6.68 | 6.07 | 6.07 | 71.4 |
| 400 | 9 | 7.10 | 6.04 | 6.05 | 74.2 |
| 400 | 10 | 6.77 | 6.12 | 6.12 | 77.1 |
| 400 | 11 | 6.09 | 6.07 | 6.14 | 79.9 |
| 400 | 12 | 5.69 | 6.14 | 6.13 | 85.5 |
| 400 | 13 | 4.68 | 6.14 | 6.13 | 85.5 |
| 400 | 15 | 3.53 | 6.14 | 6.13 | 85.5 |
| 400 | 17 | 3.17 | 6.09 | 6.13 | 85.5 |
| 400 | 19 | 2.96 | 6.14 | 6.14 | 90.9 |
| 400 | 21 | 2.81 | 6.14 | 6.13 | 90.9 |
| 400 | 23 | 2.60 | 6.10 | 6.13 | 90.9 |
| Gas flux mode/( ml/min) | Time/(h) | T/℃ | Upper gas cell pressure /Mpa | Lower gas cell pressure /Mpa | Hydrate saturation/% |
| 400 | 25 | 2.52 | 6.11 | 6.13 | 90.9 |
| 400 | 27 | 2.50 | 6.15 | 6.13 | 90.9 |
| 400 | 29 | 2.50 | 6.15 | 6.13 | 90.9 |
| 400 | 31 | 2.52 | 6.14 | 6.13 | 90.9 |
| 400 | 33 | 2.68 | 6.15 | 6.13 | 90.9 |
| 400 | 35 | 2.74 | 6.12 | 6.12 | 90.9 |
| 400 | 37 | 2.72 | 6.05 | 6.11 | 90.9 |

**Table S5. Data for Figure 3**

| Gas flux mode/( ml/min) | Time/(h) | *V*s  (ms-1) | *V*p  (ms-1) | Hydrate saturation/% |
| --- | --- | --- | --- | --- |
| 30 | 0 | 746 | 1610 | 0 |
| 30 | 1 | 746 | 1610 | 0 |
| 30 | 2 | 787 | 1858 | 7.3 |
| 30 | 2.25 | 803 | 1906 | 13.8 |
| 30 | 2.5 | 812 | 1933 | 20.6 |
| 30 | 2.75 | 821 | 2016 | 30.2 |
| 30 | 3 | 831 | 2079 | 37.9 |
| 30 | 3.25 | 846 | 2173 | 45.9 |
| 30 | 3.5 | 924 | 2207 | 51.4 |
| 30 | 3.75 | 1099 | 2242 | 54.2 |
| 30 | 4 | 1202 | 2481 | 59.9 |
| 30 | 5 | 1213 | 2525 | 62.8 |
| 30 | 6 | 1213 | 2525 | 62.8 |
| 30 | 7 | 1223 | 2572 | 65.6 |
| 30 | 8 | 1256 | 2620 | 68.5 |
| Gas flux mode/( ml/min) | Time/(h) | *V*s  (ms-1) | *V*p  (ms-1) | Hydrate saturation/% |
| 30 | 9 | 1256 | 2620 | 68.5 |
| 30 | 10 | 1291 | 2670 | 71.4 |
| 30 | 11 | 1291 | 2670 | 71.4 |
| 30 | 12 | 1291 | 2670 | 71.4 |
| 30 | 14 | 1291 | 2670 | 71.4 |
| 30 | 16 | 1291 | 2670 | 71.4 |
| 30 | 18 | 1291 | 2670 | 71.4 |
| 30 | 20 | 1291 | 2670 | 71.4 |
| 30 | 22 | 1291 | 2670 | 71.4 |
| 30 | 24 | 1291 | 2670 | 71.4 |
| 30 | 30 | 1291 | 2670 | 71.4 |
| 30 | 36 | 1291 | 2670 | 71.4 |
| 30 | 40 | 1291 | 2670 | 71.4 |
| 30 | 46 | 1291 | 2670 | 71.4 |
| 60 | 0 | 747 | 1658 | 0 |
| 60 | 1 | 747 | 1658 | 0 |
| 60 | 2 | 747 | 1658 | 0 |
| 60 | 3 | 747 | 1658 | 0 |
| 60 | 3.5 | 841 | 1881 | 13.8 |
| 60 | 4 | 889 | 2076 | 23.0 |
| 60 | 5 | 950 | 2107 | 37.9 |
| 60 | 6 | 1004 | 2173 | 48.7 |
| 60 | 7 | 1041 | 2242 | 51.5 |
| 60 | 8 | 1268 | 2620 | 68.5 |
| 60 | 9 | 1268 | 2620 | 68.5 |
| 60 | 10 | 1328 | 2722 | 74.2 |
| 60 | 11 | 1328 | 2722 | 74.2 |
| Gas flux mode/( ml/min) | Time/(h) | *V*s  (ms-1) | *V*p  (ms-1) | Hydrate saturation/% |
| 60 | 12 | 1328 | 2722 | 74.2 |
| 60 | 14 | 1328 | 2722 | 74.2 |
| 60 | 16 | 1328 | 2722 | 74.2 |
| 60 | 22 | 1328 | 2722 | 74.2 |
| 60 | 28 | 1328 | 2722 | 74.2 |
| 60 | 34 | 1328 | 2722 | 74.2 |
| 60 | 40 | 1328 | 2722 | 74.2 |
| 60 | 46 | 1328 | 2722 | 74.2 |
| 200 | 0 | 772 | 1620 | 0 |
| 200 | 1 | 772 | 1620 | 0 |
| 200 | 2 | 772 | 1620 | 0 |
| 200 | 3 | 772 | 1620 | 0 |
| 200 | 4 | 772 | 1620 | 0 |
| 200 | 5 | 834 | 1844 | 11.6 |
| 200 | 5.25 | 878 | 2016 | 23.0 |
| 200 | 5.5 | 884 | 2046 | 27.8 |
| 200 | 5.75 | 907 | 2107 | 37.9 |
| 200 | 6 | 912 | 2173 | 40.6 |
| 200 | 6.5 | 983 | 2242 | 48.7 |
| 200 | 7 | 1130 | 2481 | 65.7 |
| 200 | 8 | 1172 | 2548 | 65.7 |
| 200 | 9 | 1172 | 2548 | 65.7 |
| 200 | 10 | 1447 | 2951 | 79.9 |
| 200 | 11 | 1467 | 3015 | 79.9 |
| 200 | 12 | 1467 | 3015 | 79.9 |
| 200 | 14 | 1467 | 3015 | 79.9 |
| 200 | 16 | 1531 | 3150 | 82.7 |
| Gas flux mode/( ml/min) | Time/(h) | *V*s  (ms-1) | *V*p  (ms-1) | Hydrate saturation/% |
| 200 | 22 | 1531 | 3150 | 82.7 |
| 200 | 28 | 1531 | 3150 | 82.7 |
| 200 | 34 | 1531 | 3150 | 82.7 |
| 200 | 40 | 1531 | 3150 | 82.7 |
| 400 | 0 | 751 | 1601 | 0 |
| 400 | 1 | 751 | 1601 | 0 |
| 400 | 2 | 751 | 1601 | 0 |
| 400 | 3 | 751 | 1601 | 0 |
| 400 | 3.5 | 889 | 1933 | 18.3 |
| 400 | 4 | 969 | 2076 | 27.8 |
| 400 | 4.5 | 1019 | 2091 | 40.6 |
| 400 | 5 | 1041 | 2107 | 48.7 |
| 400 | 5.5 | 1099 | 2279 | 54.3 |
| 400 | 6 | 1172 | 2481 | 68.5 |
| 400 | 7 | 1202 | 2572 | 71.4 |
| 400 | 8 | 1202 | 2572 | 71.4 |
| 400 | 9 | 1328 | 2722 | 74.2 |
| 400 | 10 | 1482 | 2951 | 77.1 |
| 400 | 11 | 1498 | 3081 | 79.9 |
| 400 | 12 | 1548 | 3223 | 85.5 |
| 400 | 13 | 1548 | 3223 | 85.5 |
| 400 | 15 | 1548 | 3223 | 85.5 |
| 400 | 17 | 1548 | 3223 | 85.5 |
| 400 | 19 | 1639 | 3299 | 90.9 |
| 400 | 21 | 1639 | 3299 | 90.9 |
| 400 | 23 | 1639 | 3299 | 90.9 |
| 400 | 25 | 1639 | 3299 | 90.9 |
| Gas flux mode/( ml/min) | Time/(h) | *V*s  (ms-1) | *V*p  (ms-1) | Hydrate saturation/% |
| 400 | 27 | 1639 | 3299 | 90.9 |
| 400 | 29 | 1639 | 3299 | 90.9 |
| 400 | 31 | 1639 | 3299 | 90.9 |
| 400 | 33 | 1639 | 3299 | 90.9 |
| 400 | 35 | 1639 | 3299 | 90.9 |
| 400 | 37 | 1639 | 3299 | 90.9 |

**Table S6. Data for Figure 6**

| Gas flux mode/( ml/min) | Time/(h) | Hydrate saturation/% |
| --- | --- | --- |
| 30 | 0 | 0 |
| 30 | 1 | 0 |
| 30 | 2 | 7.3 |
| 30 | 2.25 | 13.8 |
| 30 | 2.5 | 20.6 |
| 30 | 2.75 | 30.2 |
| 30 | 3 | 37.9 |
| 30 | 3.25 | 45.9 |
| 30 | 3.5 | 51.4 |
| 30 | 3.75 | 54.2 |
| 30 | 4 | 59.9 |
| 30 | 5 | 62.8 |
| 30 | 6 | 62.8 |
| 30 | 7 | 65.6 |
| 30 | 8 | 68.5 |
| 30 | 9 | 68.5 |
| 30 | 10 | 71.4 |
| Gas flux mode/( ml/min) | Time/(h) | Hydrate saturation/% |
| 30 | 11 | 71.4 |
| 30 | 12 | 71.4 |
| 30 | 14 | 71.4 |
| 30 | 16 | 71.4 |
| 30 | 18 | 71.4 |
| 30 | 20 | 71.4 |
| 30 | 22 | 71.4 |
| 30 | 24 | 71.4 |
| 30 | 30 | 71.4 |
| 60 | 0 | 0 |
| 60 | 1 | 0 |
| 60 | 2 | 0 |
| 60 | 3 | 0 |
| 60 | 3.5 | 13.8 |
| 60 | 4 | 23.0 |
| 60 | 5 | 37.9 |
| 60 | 6 | 48.7 |
| 60 | 7 | 51.5 |
| 60 | 8 | 68.5 |
| 60 | 9 | 68.5 |
| 60 | 10 | 74.2 |
| 60 | 11 | 74.2 |
| 60 | 12 | 74.2 |
| 60 | 14 | 74.2 |
| 60 | 16 | 74.2 |
| 60 | 22 | 74.2 |
| 60 | 28 | 74.2 |
| 200 | 0 | 0 |
| Gas flux mode/( ml/min) | Time/(h) | Hydrate saturation/% |
| 200 | 1 | 0 |
| 200 | 2 | 0 |
| 200 | 3 | 0 |
| 200 | 4 | 0 |
| 200 | 5 | 11.6 |
| 200 | 5.25 | 23.0 |
| 200 | 5.5 | 27.8 |
| 200 | 5.75 | 37.9 |
| 200 | 6 | 40.6 |
| 200 | 6.5 | 48.7 |
| 200 | 7 | 65.7 |
| 200 | 8 | 65.7 |
| 200 | 9 | 65.7 |
| 200 | 10 | 79.9 |
| 200 | 11 | 79.9 |
| 200 | 12 | 79.9 |
| 200 | 14 | 79.9 |
| 200 | 16 | 82.7 |
| 200 | 22 | 82.7 |
| 200 | 28 | 82.7 |
| 400 | 0 | 0 |
| 400 | 1 | 0 |
| 400 | 2 | 0 |
| 400 | 3 | 0 |
| 400 | 3.5 | 18.3 |
| 400 | 4 | 27.8 |
| 400 | 4.5 | 40.6 |
| 400 | 5 | 48.7 |
| Gas flux mode/( ml/min) | Time/(h) | Hydrate saturation/% |
| 400 | 5.5 | 54.3 |
| 400 | 6 | 68.5 |
| 400 | 7 | 71.4 |
| 400 | 8 | 71.4 |
| 400 | 9 | 74.2 |
| 400 | 10 | 77.1 |
| 400 | 11 | 79.9 |
| 400 | 12 | 85.5 |
| 400 | 13 | 85.5 |
| 400 | 15 | 85.5 |
| 400 | 17 | 85.5 |
| 400 | 19 | 90.9 |
| 400 | 21 | 90.9 |
| 400 | 23 | 90.9 |
| 400 | 25 | 90.9 |
| 400 | 27 | 90.9 |
| 400 | 29 | 90.9 |
| 400 | 31 | 90.9 |

**Table S7. Data for Figure 7**

| Gas flux mode/( ml/min) | Hydrate saturation/% | *V*p  (ms-1) | *V*s  (ms-1) |
| --- | --- | --- | --- |
| 30 | 0 | 1610 | 746 |
| 30 | 0 | 1610 | 746 |
| 30 | 7.3 | 1858 | 787 |
| 30 | 13.8 | 1906 | 803 |
| 30 | 20.6 | 1933 | 812 |
| Gas flux mode/( ml/min) | Hydrate saturation/% | *V*p  (ms-1) | *V*s  (ms-1) |
| 30 | 30.2 | 2016 | 821 |
| 30 | 37.9 | 2079 | 831 |
| 30 | 45.9 | 2173 | 846 |
| 30 | 51.4 | 2207 | 924 |
| 30 | 54.2 | 2242 | 1099 |
| 30 | 59.9 | 2481 | 1202 |
| 30 | 62.8 | 2525 | 1213 |
| 30 | 62.8 | 2525 | 1213 |
| 30 | 65.6 | 2572 | 1223 |
| 30 | 68.5 | 2620 | 1256 |
| 30 | 68.5 | 2620 | 1256 |
| 30 | 71.4 | 2670 | 1291 |
| 30 | 71.4 | 2670 | 1291 |
| 30 | 71.4 | 2670 | 1291 |
| 30 | 71.4 | 2670 | 1291 |
| 30 | 71.4 | 2670 | 1291 |
| 30 | 71.4 | 2670 | 1291 |
| 30 | 71.4 | 2670 | 1291 |
| 30 | 71.4 | 2670 | 1291 |
| 30 | 71.4 | 2670 | 1291 |
| 30 | 71.4 | 2670 | 1291 |
| 30 | 71.4 | 2670 | 1291 |
| 30 | 71.4 | 2670 | 1291 |
| 30 | 71.4 | 2670 | 1291 |
| 60 | 0 | 1658 | 747 |
| 60 | 0 | 1658 | 747 |
| 60 | 0 | 1658 | 747 |
| Gas flux mode/( ml/min) | Hydrate saturation/% | *V*p  (ms-1) | *V*s  (ms-1) |
| 60 | 0 | 1658 | 747 |
| 60 | 13.8 | 1881 | 841 |
| 60 | 23.0 | 2076 | 889 |
| 60 | 37.9 | 2107 | 950 |
| 60 | 48.7 | 2173 | 1004 |
| 60 | 51.5 | 2242 | 1041 |
| 60 | 68.5 | 2620 | 1268 |
| 60 | 68.5 | 2620 | 1268 |
| 60 | 74.2 | 2722 | 1328 |
| 60 | 74.2 | 2722 | 1328 |
| 60 | 74.2 | 2722 | 1328 |
| 60 | 74.2 | 2722 | 1328 |
| 60 | 74.2 | 2722 | 1328 |
| 60 | 74.2 | 2722 | 1328 |
| 60 | 74.2 | 2722 | 1328 |
| 60 | 74.2 | 2722 | 1328 |
| 60 | 74.2 | 2722 | 1328 |
| 60 | 74.2 | 2722 | 1328 |
| 200 | 0 | 1620 | 772 |
| 200 | 0 | 1620 | 772 |
| 200 | 0 | 1620 | 772 |
| 200 | 0 | 1620 | 772 |
| 200 | 0 | 1620 | 772 |
| 200 | 11.6 | 1844 | 834 |
| 200 | 23.0 | 2016 | 878 |
| 200 | 27.8 | 2046 | 884 |
| 200 | 37.9 | 2107 | 907 |
| Gas flux mode/( ml/min) | Hydrate saturation/% | *V*p  (ms-1) | *V*s  (ms-1) |
| 200 | 40.6 | 2173 | 912 |
| 200 | 48.7 | 2242 | 983 |
| 200 | 65.7 | 2481 | 1130 |
| 200 | 65.7 | 2548 | 1172 |
| 200 | 65.7 | 2548 | 1172 |
| 200 | 79.9 | 2951 | 1447 |
| 200 | 79.9 | 3015 | 1467 |
| 200 | 79.9 | 3015 | 1467 |
| 200 | 79.9 | 3015 | 1467 |
| 200 | 82.7 | 3150 | 1531 |
| 200 | 82.7 | 3150 | 1531 |
| 200 | 82.7 | 3150 | 1531 |
| 200 | 82.7 | 3150 | 1531 |
| 200 | 82.7 | 3150 | 1531 |
| 400 | 0 | 1601 | 751 |
| 400 | 0 | 1601 | 751 |
| 400 | 0 | 1601 | 751 |
| 400 | 0 | 1601 | 751 |
| 400 | 18.3 | 1933 | 889 |
| 400 | 27.8 | 2076 | 969 |
| 400 | 40.6 | 2091 | 1019 |
| 400 | 48.7 | 2107 | 1041 |
| 400 | 54.3 | 2279 | 1099 |
| 400 | 68.5 | 2481 | 1172 |
| 400 | 71.4 | 2572 | 1202 |
| 400 | 71.4 | 2572 | 1202 |
| 400 | 74.2 | 2722 | 1328 |
| Gas flux mode/( ml/min) | Hydrate saturation/% | *V*p  (ms-1) | *V*s  (ms-1) |
| 400 | 77.1 | 2951 | 1482 |
| 400 | 79.9 | 3081 | 1498 |
| 400 | 85.5 | 3223 | 1548 |
| 400 | 85.5 | 3223 | 1548 |
| 400 | 85.5 | 3223 | 1548 |
| 400 | 85.5 | 3223 | 1548 |
| 400 | 90.9 | 3299 | 1639 |
| 400 | 90.9 | 3299 | 1639 |
| 400 | 90.9 | 3299 | 1639 |
| 400 | 90.9 | 3299 | 1639 |
| 400 | 90.9 | 3299 | 1639 |
| 400 | 90.9 | 3299 | 1639 |
| 400 | 90.9 | 3299 | 1639 |
| 400 | 90.9 | 3299 | 1639 |
| 400 | 90.9 | 3299 | 1639 |
| 400 | 90.9 | 3299 | 1639 |

**Table S8. Data for Figure 8**

| Gas flux mode/( ml/min) | Hydrate saturation/% | *V*p  (ms-1) | *V*s  (ms-1) |
| --- | --- | --- | --- |
| 30 | 0 | 1610 | 746 |
| 30 | 0 | 1610 | 746 |
| 30 | 7.3 | 1858 | 787 |
| 30 | 13.8 | 1906 | 803 |
| 30 | 20.6 | 1933 | 812 |
| 30 | 30.2 | 2016 | 821 |
| Gas flux mode/( ml/min) | Hydrate saturation/% | *V*p  (ms-1) | *V*s  (ms-1) |
| 30 | 37.9 | 2079 | 831 |
| 30 | 45.9 | 2173 | 846 |
| 30 | 51.4 | 2207 | 924 |
| 30 | 54.2 | 2242 | 1099 |
| 30 | 59.9 | 2481 | 1202 |
| 30 | 62.8 | 2525 | 1213 |
| 30 | 62.8 | 2525 | 1213 |
| 30 | 65.6 | 2572 | 1223 |
| 30 | 68.5 | 2620 | 1256 |
| 30 | 68.5 | 2620 | 1256 |
| 30 | 71.4 | 2670 | 1291 |
| 30 | 71.4 | 2670 | 1291 |
| 30 | 71.4 | 2670 | 1291 |
| 30 | 71.4 | 2670 | 1291 |
| 30 | 71.4 | 2670 | 1291 |
| 30 | 71.4 | 2670 | 1291 |
| 30 | 71.4 | 2670 | 1291 |
| 30 | 71.4 | 2670 | 1291 |
| 30 | 71.4 | 2670 | 1291 |
| 30 | 71.4 | 2670 | 1291 |
| 30 | 71.4 | 2670 | 1291 |
| 30 | 71.4 | 2670 | 1291 |
| 30 | 71.4 | 2670 | 1291 |
| 60 | 0 | 1658 | 747 |
| 60 | 0 | 1658 | 747 |
| 60 | 0 | 1658 | 747 |
| 60 | 0 | 1658 | 747 |
| Gas flux mode/( ml/min) | Hydrate saturation/% | *V*p  (ms-1) | *V*s  (ms-1) |
| 60 | 13.8 | 1881 | 841 |
| 60 | 23.0 | 2076 | 889 |
| 60 | 37.9 | 2107 | 950 |
| 60 | 48.7 | 2173 | 1004 |
| 60 | 51.5 | 2242 | 1041 |
| 60 | 68.5 | 2620 | 1268 |
| 60 | 68.5 | 2620 | 1268 |
| 60 | 74.2 | 2722 | 1328 |
| 60 | 74.2 | 2722 | 1328 |
| 60 | 74.2 | 2722 | 1328 |
| 60 | 74.2 | 2722 | 1328 |
| 60 | 74.2 | 2722 | 1328 |
| 60 | 74.2 | 2722 | 1328 |
| 60 | 74.2 | 2722 | 1328 |
| 60 | 74.2 | 2722 | 1328 |
| 60 | 74.2 | 2722 | 1328 |
| 60 | 74.2 | 2722 | 1328 |
| 200 | 0 | 1620 | 772 |
| 200 | 0 | 1620 | 772 |
| 200 | 0 | 1620 | 772 |
| 200 | 0 | 1620 | 772 |
| 200 | 0 | 1620 | 772 |
| 200 | 11.6 | 1844 | 834 |
| 200 | 23.0 | 2016 | 878 |
| 200 | 27.8 | 2046 | 884 |
| 200 | 37.9 | 2107 | 907 |
| 200 | 40.6 | 2173 | 912 |
| Gas flux mode/( ml/min) | Hydrate saturation/% | *V*p  (ms-1) | *V*s  (ms-1) |
| 200 | 48.7 | 2242 | 983 |
| 200 | 65.7 | 2481 | 1130 |
| 200 | 65.7 | 2548 | 1172 |
| 200 | 65.7 | 2548 | 1172 |
| 200 | 79.9 | 2951 | 1447 |
| 200 | 79.9 | 3015 | 1467 |
| 200 | 79.9 | 3015 | 1467 |
| 200 | 79.9 | 3015 | 1467 |
| 200 | 82.7 | 3150 | 1531 |
| 200 | 82.7 | 3150 | 1531 |
| 200 | 82.7 | 3150 | 1531 |
| 200 | 82.7 | 3150 | 1531 |
| 200 | 82.7 | 3150 | 1531 |
| 400 | 0 | 1601 | 751 |
| 400 | 0 | 1601 | 751 |
| 400 | 0 | 1601 | 751 |
| 400 | 0 | 1601 | 751 |
| 400 | 18.3 | 1933 | 889 |
| 400 | 27.8 | 2076 | 969 |
| 400 | 40.6 | 2091 | 1019 |
| 400 | 48.7 | 2107 | 1041 |
| 400 | 54.3 | 2279 | 1099 |
| 400 | 68.5 | 2481 | 1172 |
| 400 | 71.4 | 2572 | 1202 |
| 400 | 71.4 | 2572 | 1202 |
| 400 | 74.2 | 2722 | 1328 |
| 400 | 77.1 | 2951 | 1482 |
| Gas flux mode/( ml/min) | Hydrate saturation/% | *V*p  (ms-1) | *V*s  (ms-1) |
| 400 | 79.9 | 3081 | 1498 |
| 400 | 85.5 | 3223 | 1548 |
| 400 | 85.5 | 3223 | 1548 |
| 400 | 85.5 | 3223 | 1548 |
| 400 | 85.5 | 3223 | 1548 |
| 400 | 90.9 | 3299 | 1639 |
| 400 | 90.9 | 3299 | 1639 |
| 400 | 90.9 | 3299 | 1639 |
| 400 | 90.9 | 3299 | 1639 |
| 400 | 90.9 | 3299 | 1639 |
| 400 | 90.9 | 3299 | 1639 |
| 400 | 90.9 | 3299 | 1639 |
| 400 | 90.9 | 3299 | 1639 |
| 400 | 90.9 | 3299 | 1639 |
| 400 | 90.9 | 3299 | 1639 |

**BGTL model**

On the basis of Biot-Gassmann theory, the BGTL model is extended to include the effect of differential pressure and consolidation on the velocity. The formulas of the BGTL are given below.

, (1)

where *k*, μ and ρ are bulk modulus, shear modulus and density of the formation, respectively. The density is derived from the weighted average of constituent components of the sediment. The bulk modulus is given by the following formula using the Biot coefficient *B*:

, (2)

where *kma* and *kfl* are bulk modulus of the matrix and the pore fluid, respectively. *B* means the ratio of the change in fluid volume to the change in formation volume, and it’s a function of the formation porosity. The term *M* is a modulus that measures the variation in the hydraulic pressure needed to force an amount of water into the formation without any change in formation volume. The BGTL model assumes that shear modulus of sediments can be estimated from the following relation of the velocity ratio:

(3)

where *G* is introduced to correct the discrepancy mainly caused by clay in the matrix, *n* incorporates the effect of differential pressure and consolidation of sediments and *α* is the Vs/Vp ratio of the matrix, that is

∣matrix = (4)

where *kma* and *μma* are bulk modulus and shear modulus of the matrix, respectively. They are calculated from those of the individual mineral constituents using Hill’s average formula:

, (5)

where *j* is the number of mineral constituents (hydrate acts as a mineral); *fi* is the volumetric fraction of the *i*-th constituent in the matrix; and *ki* and *μi* are the bulk and shear moduli of the *i*-th constituent, respectively. The shear modulus of the formation is derived by

(6)

With equations (1~6), we can derive both *Vp* and *Vs* of the formation. It’s apparent that gas hydrate is modeled as part of the frame with BGTL.

**WE model**

With a weighting factor *W* and a constant *n*, *Lee et al*. proposed a weighted equation based on the three-phase time-average and Wood equations to derive a relationship between the compressional wave velocity and the hydrate saturation. The formulas of the WE model follow:

(7)

(8)

Where *α*, *β* and *γ* are *Vs*/*Vp* ratios of the matrix, the pure hydrate, and the fluid, respectively. *V*p1 is the P-wave velocity calculated by the Wood equation; *V*p2 is the P-wave velocity calculated by the time-average equation. They are derived by equation (9) and (10), respectively.

(9)

(10)

where *ρw*, *ρh*, and *ρma* are density of the water, pure hydrate, and matrix, respectively; *Vw*, *Vh* and *Vma* are compressional velocity of the water, pure hydrate and matrix, respectively. *ρma* is derived from the weighted average of constituent components of the matrix.

(11)

where *kma* and *μma* can be calculated with equation (5), but hydrate is not treated as a mineral within the matrix.

**Wood model**

The Wood equation is usually applied to a saturated fluid pore medium with a large saturation. The Wood equation of the hydrate is:

(12)

where *ρ*, *ρw*, *ρh*, *ρm* are the density of the deposition medium, water, pure hydrate and sedimentary skeleton, respectively.

**K-T model**

Kuster and Toksoz proposed this formula, which Zimmerman and King used to calculate the longitudinal and shear wave velocities of loose permafrost deposits. The effective bulk modulus and shear modulus are obtained from the K-T equation:

(13)

(14)

The subscripts *m* and *i* refer to the matrix and inclusions, and *Ic* refers to the inclusion content. The calculation process for the four-phase hydrate deposit is as follows:

1. Calculate the effective bulk modulus and shear modulus of the water, hydrate mixture, with hydrate as the matrix and water as the inclusion.

2. Clay is considered to be an inclusion, and a water-hydrate mixture acts as a matrix.

3. Sand as an inclusion, a clay-water-hydrate mixture as a matrix.

Using the calculated bulk modulus and shear modulus *K* and *G*, the longitudinal and transverse wave velocities can be calculated from equation (1).

**Table S9. Data for Figure 9**

| Gas flux mode/( ml/min) | Hydrate saturation/% | *V*p(ms-1) |
| --- | --- | --- |
| 30 | 0 | 1610 |
| 30 | 0 | 1610 |
| 30 | 7.3 | 1858 |
| 30 | 13.8 | 1906 |
| 30 | 20.6 | 1933 |
| 30 | 30.2 | 2016 |
| 30 | 37.9 | 2079 |
| 30 | 45.9 | 2173 |
| Gas flux mode/( ml/min) | Hydrate saturation/% | *V*p(ms-1) |
| 30 | 51.4 | 2207 |
| 30 | 54.2 | 2242 |
| 30 | 59.9 | 2481 |
| 30 | 62.8 | 2525 |
| 30 | 62.8 | 2525 |
| 30 | 65.6 | 2572 |
| 30 | 68.5 | 2620 |
| 30 | 68.5 | 2620 |
| 30 | 71.4 | 2670 |
| 30 | 71.4 | 2670 |
| 30 | 71.4 | 2670 |
| 30 | 71.4 | 2670 |
| 30 | 71.4 | 2670 |
| 30 | 71.4 | 2670 |
| 30 | 71.4 | 2670 |
| 30 | 71.4 | 2670 |
| 30 | 71.4 | 2670 |
| 30 | 71.4 | 2670 |
| 30 | 71.4 | 2670 |
| 30 | 71.4 | 2670 |
| 30 | 71.4 | 2670 |
| 60 | 0 | 1658 |
| 60 | 0 | 1658 |
| 60 | 0 | 1658 |
| 60 | 0 | 1658 |
| 60 | 13.8 | 1881 |
| 60 | 23.0 | 2076 |
| 60 | 37.9 | 2107 |
| Gas flux mode/( ml/min) | Hydrate saturation/% | *V*p(ms-1) |
| 60 | 48.7 | 2173 |
| 60 | 51.5 | 2242 |
| 60 | 68.5 | 2620 |
| 60 | 68.5 | 2620 |
| 60 | 74.2 | 2722 |
| 60 | 74.2 | 2722 |
| 60 | 74.2 | 2722 |
| 60 | 74.2 | 2722 |
| 60 | 74.2 | 2722 |
| 60 | 74.2 | 2722 |
| 60 | 74.2 | 2722 |
| 60 | 74.2 | 2722 |
| 60 | 74.2 | 2722 |
| 60 | 74.2 | 2722 |
| 200 | 0 | 1620 |
| 200 | 0 | 1620 |
| 200 | 0 | 1620 |
| 200 | 0 | 1620 |
| 200 | 0 | 1620 |
| 200 | 11.6 | 1844 |
| 200 | 23.0 | 2016 |
| 200 | 27.8 | 2046 |
| 200 | 37.9 | 2107 |
| 200 | 40.6 | 2173 |
| 200 | 48.7 | 2242 |
| 200 | 65.7 | 2481 |
| 200 | 65.7 | 2548 |
| 200 | 65.7 | 2548 |
| Gas flux mode/( ml/min) | Hydrate saturation/% | *V*p(ms-1) |
| 200 | 79.9 | 2951 |
| 200 | 79.9 | 3015 |
| 200 | 79.9 | 3015 |
| 200 | 79.9 | 3015 |
| 200 | 82.7 | 3150 |
| 200 | 82.7 | 3150 |
| 200 | 82.7 | 3150 |
| 200 | 82.7 | 3150 |
| 200 | 82.7 | 3150 |
| 400 | 0 | 1601 |
| 400 | 0 | 1601 |
| 400 | 0 | 1601 |
| 400 | 0 | 1601 |
| 400 | 18.3 | 1933 |
| 400 | 27.8 | 2076 |
| 400 | 40.6 | 2091 |
| 400 | 48.7 | 2107 |
| 400 | 54.3 | 2279 |
| 400 | 68.5 | 2481 |
| 400 | 71.4 | 2572 |
| 400 | 71.4 | 2572 |
| 400 | 74.2 | 2722 |
| 400 | 77.1 | 2951 |
| 400 | 79.9 | 3081 |
| 400 | 85.5 | 3223 |
| 400 | 85.5 | 3223 |
| 400 | 85.5 | 3223 |
| 400 | 85.5 | 3223 |
| Gas flux mode/( ml/min) | Hydrate saturation/% | *V*p(ms-1) |
| 400 | 90.9 | 3299 |
| 400 | 90.9 | 3299 |
| 400 | 90.9 | 3299 |
| 400 | 90.9 | 3299 |
| 400 | 90.9 | 3299 |
| 400 | 90.9 | 3299 |
| 400 | 90.9 | 3299 |
| 400 | 90.9 | 3299 |
| 400 | 90.9 | 3299 |
| 400 | 90.9 | 3299 |

**Effective Medium Theory**

Effective medium theory is propose by Helgerud (1999) and Dvorkin (1999), mainly for unconsolidated sediments with high porosity. Ecker (2001) proposed three kinds of microscopic models for hydrate-bearing sediments, and three formulas are given according to the three models in the effective medium theory. In Model A, hydrates are considered to be part of the pore fluids; in model B, hydrates are considered to be part of the sediment frame, and two effects are produced, it not only decreases the porosity, but also change the bulk modulus and shear modulus of the matrix; in model C, the porosity is decreased as in model B, and the change of the bulk modulus and shear modulus should be to be amended based on cementation theory by Dvorkin et al. (1993). The calculation of the three models are as follows:

**Model A of the effective medium theory**

The formula of P wave velocity *Vp* and the bulk density *ρb* are given as follows:

(15)

(16)

Where, *Ksat* and *Gsat* are the bulk modulus and shear modulus of the effective medium, respectively; *ρs* and *ρf* are the bulk density in rock solid and fluid phases. Both of the densities can be calculated by arithmetic mean of density based on the volume percentage of the components, *φc* is the critical porosity, and generally take 0.36 ~ 0.40 (Nur et al., 1995). When sediments are filling of fluids with the bulk modulus *Kf*, according to Gassmann equation, the bulk modulus and shear modulus of the sediments can be given by the following formulas:

(17)

(18)

where *Kma* and *Kf* are bulk modulus of the matrix and the pore fluid, respectively. *Kdry* and *Gdry* are bulk modulus and shear modulus of the dry rock. In mode A, hydrates formed in the pores, thus *Kf* is given as follows:

(19)

Where *Sh* and *Kh* are hydrate saturation in pore space and the bulk modulus of hydrate, *Kw* is the bulk modulus of water. The formulas of *Kdry* and *Gdry* are given as follows:

(20)

(21)

(22)

Where,, (23)

where P is effective pressure, *Kma* and *Gma* are bulk modulus and shear modulus of the matrix, *v* is Poisson’s ratio of the rock matrix, and; *n* is the average number of contact grains in bulk unit, generally take 8~9.5.

**Model B of the effective medium theory**

hydrate is considered to be part of the matrix in Model B, it not only decreases the porosity, but also change the bulk modulus and shear modulus of the matrix. Therefore, based on the model A, the sediment porosity need to be amended,. At the same time, hydrate should be taken as a mineral component in the formula to calculate the *Kma* and *Gma*. In addition, water is the only pore fluid in the sediment. Since the hydrate decreases the porosity, we should pay attention to the porosity *φr* and *φc* when calculate *Kdry* and *Gdry*, select the appropriate formula in formula (20) and (21).

We can account for the distribution dependant effects of gas on the sediment’s elastic properties by modifying the calculation of the sediment’s saturated bulk modulus (*Ksat*). If we consider the effects of gas, the bulk modulus of pore fluid (*Kf*) is given as follows:

(24)

Where *Kw* and *Kg* are the bulk modulus of water and gas, and *Sw* is the water saturation.

**Model C of the effective medium theory**

in model C, the porosity is decreased as in model B, and the change of the bulk modulus and shear modulus should be to be amended based on cementation theory by Dvorkin et al. (1993). Thus, the calculation of *φr*, *Kma*, *Gma*, *Kf* and *ρf* are as same as in model B, *Kdry* and *Gdry* are given as the following formula:

(25)

(26)

where *Sn* and *Sτ* are parameters which have positive correlation with cemented pressure and the amount of hydrate, the formulas are as follows:

(27)

where,

,

,

,

(28)

;;;

Where, *Gh* and *vh* are shear modulus and Poisson's ratio of hydrate, α is the radius ratio of cemented particles and sedimentparticles after hydrate cemented sediments particles.

(29)

(30)

where *m* is the number of mineral constituents (hydrate acts as a mineral); *fi* is the volumetric fraction of the *i*-th constituent in the matrix; and *Ki* and *Gi* are the bulk and shear moduli of the *i*-th constituent, respectively.

In Mode B and C, the formed hydrate contact or cement sediments, and it is considered to be free of hydrate in the pore fluid. When we used this model before, the pore fluid was completely treated as water, the density and bulk modulus of water were treated as the density and bulk modulus of the pore fluid. Ignoring the presence of gas, which results in a deviation from the calculation of the density of the deposition medium and the calculation of the pore volume of the pore fluid. In order to take into account the effect of the gas on the elastic wave velocity of the deposition system, the volume modulus *K*sat of the equivalent medium is modified. *K*sat is calculated by the Gassmann equation(17).

The effect of the gas is taken into account in the case that the model is divided into two cases. The first is the homogenous gas distribution which assumes that each pore has the same proportions of gas and water. Based on this consideration, the bulk modulus of the fluid is recalculated according to Reuss's method:

(31)

where*Kg* and *Kw* are the bulk modulus of gas and water, and *Sw* is the water saturation. In the calculation, *K*f is replaced by the new calculated *K*f of equation (31), and the volume modulus *K*sat of the equivalent medium is obtained by substituting *K*f in equation (17).

The other is the gas patchy distribution, this possible distribution occurs when gas patches much larger than the average pore size are fully surrounded by water-saturated sediment. In this case, the volume modulus *K*sat of the effective medium is calculated by the equations of Dvorkin and Nur (1998)：

(32)

Where *K*satW and *K*satG are the bulk modulus when the deposit is completely filled with water and gas. *K*satW and *K*satG were obtained by substituting *K*w and *K*g for *K*f in equation (17), respectively.

In both cases, the shear modulus is constant, *G*sat = *G*Dry (see appendix). The density of the deposition medium is calculated by:

(33)

**Table S10. Data for Figure 11**

| Gas flux mode/( ml/min) | Hydrate saturation/% | G/(GPa) |
| --- | --- | --- |
| 30 | 0 | 1.13 |
| 30 | 7.3 | 1.26 |
| 30 | 13.8 | 1.30 |
| 30 | 20.6 | 1.33 |
| 30 | 30.3 | 1.36 |
| 30 | 37.9 | 1.39 |
| 30 | 46.0 | 1.44 |
| 30 | 51.5 | 1.72 |
| 30 | 54.3 | 2.43 |
| 60 | 0 | 1.13 |
| 60 | 13.8 | 1.43 |
| 60 | 23.0 | 1.60 |
| 60 | 37.9 | 1.82 |
| 60 | 48.7 | 2.03 |
| 60 | 51.5 | 2.18 |
| 200 | 0 | 1.13 |
| 200 | 11.6 | 1.41 |
| 200 | 23.0 | 1.56 |
| 200 | 27.8 | 1.58 |
| 200 | 37.9 | 1.66 |
| 200 | 40.6 | 1.68 |
| 200 | 48.7 | 1.94 |
| Gas flux mode/( ml/min) | Hydrate saturation/% | G/(GPa) |
| 400 | 0 | 1.13 |
| 400 | 18.3 | 1.60 |
| 400 | 27.8 | 1.90 |
| 400 | 40.6 | 2.09 |
| 400 | 48.7 | 2.18 |
| 400 | 54.3 | 2.43 |

| Gas flux mode/( ml/min) | Hydrate saturation/% | *V*s(ms-1) |
| --- | --- | --- |
| 30 | 0 | 746 |
| 30 | 0 | 746 |
| 30 | 7.3 | 787 |
| 30 | 13.8 | 803 |
| 30 | 20.6 | 812 |
| 30 | 30.2 | 821 |
| 30 | 37.9 | 831 |
| 30 | 45.9 | 846 |
| 30 | 51.4 | 924 |
| 30 | 54.2 | 1099 |
| 30 | 59.9 | 1202 |
| 30 | 62.8 | 1213 |
| 30 | 62.8 | 1213 |
| 30 | 65.6 | 1223 |
| 30 | 68.5 | 1256 |
| 30 | 68.5 | 1256 |
| 30 | 71.4 | 1291 |
| 30 | 71.4 | 1291 |
| 30 | 71.4 | 1291 |
| 30 | 71.4 | 1291 |
| Gas flux mode/( ml/min) | Hydrate saturation/% | *V*s(ms-1) |
| 30 | 71.4 | 1291 |
| 30 | 71.4 | 1291 |
| 30 | 71.4 | 1291 |
| 30 | 71.4 | 1291 |
| 30 | 71.4 | 1291 |
| 30 | 71.4 | 1291 |
| 30 | 71.4 | 1291 |
| 30 | 71.4 | 1291 |
| 30 | 71.4 | 1291 |
| 60 | 0 | 747 |
| 60 | 0 | 747 |
| 60 | 0 | 747 |
| 60 | 0 | 747 |
| 60 | 13.8 | 841 |
| 60 | 23.0 | 889 |
| 60 | 37.9 | 950 |
| 60 | 48.7 | 1004 |
| 60 | 51.5 | 1041 |
| 60 | 68.5 | 1268 |
| 60 | 68.5 | 1268 |
| 60 | 74.2 | 1328 |
| 60 | 74.2 | 1328 |
| 60 | 74.2 | 1328 |
| 60 | 74.2 | 1328 |
| 60 | 74.2 | 1328 |
| 60 | 74.2 | 1328 |
| 60 | 74.2 | 1328 |
| 60 | 74.2 | 1328 |
| Gas flux mode/( ml/min) | Hydrate saturation/% | *V*s(ms-1) |
| 60 | 74.2 | 1328 |
| 60 | 74.2 | 1328 |
| 200 | 0 | 772 |
| 200 | 0 | 772 |
| 200 | 0 | 772 |
| 200 | 0 | 772 |
| 200 | 0 | 772 |
| 200 | 11.6 | 834 |
| 200 | 23.0 | 878 |
| 200 | 27.8 | 884 |
| 200 | 37.9 | 907 |
| 200 | 40.6 | 912 |
| 200 | 48.7 | 983 |
| 200 | 65.7 | 1130 |
| 200 | 65.7 | 1172 |
| 200 | 65.7 | 1172 |
| 200 | 79.9 | 1447 |
| 200 | 79.9 | 1467 |
| 200 | 79.9 | 1467 |
| 200 | 79.9 | 1467 |
| 200 | 82.7 | 1531 |
| 200 | 82.7 | 1531 |
| 200 | 82.7 | 1531 |
| 200 | 82.7 | 1531 |
| 200 | 82.7 | 1531 |
| 400 | 0 | 751 |
| 400 | 0 | 751 |
| 400 | 0 | 751 |
| Gas flux mode/( ml/min) | Hydrate saturation/% | *V*s(ms-1) |
| 400 | 0 | 751 |
| 400 | 18.3 | 889 |
| 400 | 27.8 | 969 |
| 400 | 40.6 | 1019 |
| 400 | 48.7 | 1041 |
| 400 | 54.3 | 1099 |
| 400 | 68.5 | 1172 |
| 400 | 71.4 | 1202 |
| 400 | 71.4 | 1202 |
| 400 | 74.2 | 1328 |
| 400 | 77.1 | 1482 |
| 400 | 79.9 | 1498 |
| 400 | 85.5 | 1548 |
| 400 | 85.5 | 1548 |
| 400 | 85.5 | 1548 |
| 400 | 85.5 | 1548 |
| 400 | 90.9 | 1639 |
| 400 | 90.9 | 1639 |
| 400 | 90.9 | 1639 |
| 400 | 90.9 | 1639 |
| 400 | 90.9 | 1639 |
| 400 | 90.9 | 1639 |
| 400 | 90.9 | 1639 |
| 400 | 90.9 | 1639 |
| 400 | 90.9 | 1639 |
| 400 | 90.9 | 1639 |
